# Supplementary material for: Correlation between Metal Ions and Cytokines in the Saliva of Patients with Oral Lichenoid Lesions
Source: PubMed Central journal article supplement — Yonsei Med J. 2021 Jul 19;62(8):767–75. doi: 10.3349/ymj.2021.62.8.767 (PMC8298875; doi:10.3349/ymj.2021.62.8.767), 2021-07-19
Supplement: ymj-62-767-s001.pdf [file ymj-62-767-s001.pdf]

**Supplementary Table 1.** Correlations among Cytokine Concentrations.

|              | <b>IL-6</b> | <b>IL-8</b> | <b>IL-1<math>\beta</math></b> | <b>TNF-<math>\alpha</math></b> |
|--------------|-------------|-------------|-------------------------------|--------------------------------|
| IL-6         |             |             |                               |                                |
| r            |             | 0.211*      | 0.067                         | 0.102                          |
| <i>p</i>     |             | 0.030       | 0.495                         | 0.298                          |
| IL-8         |             |             |                               |                                |
| r            |             |             | 0.413                         | -0.081                         |
| <i>p</i>     |             |             | <0.001 <sup>†</sup>           | 0.408                          |
| IL-1 $\beta$ |             |             |                               |                                |
| r            |             |             |                               | -0.063                         |
| <i>p</i>     |             |             |                               | 0.518                          |

IL, interleukin; TNF, tumor necrosis factor.

r=Pearson's correlation coefficient; *p* values were obtained by Pearson's correlation.

\**p*<0.05, <sup>†</sup>*p*<0.001.
